# Supplementary material
Source: Springer Nature journal article supplement (https://www.springermedizin.de/resource/supplementary/13069_2008_5_MOESM8_ESM.pdf/9659588)

### $\alpha$ -Tocopherol (vitamin E)

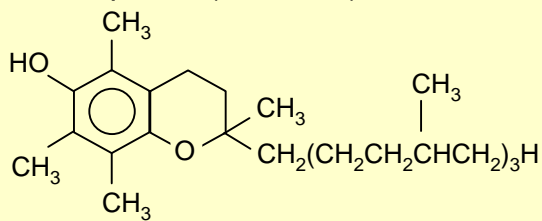

### Promethazine

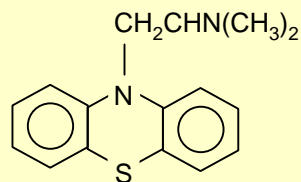

### Butylated hydroxyanisole (BHA)

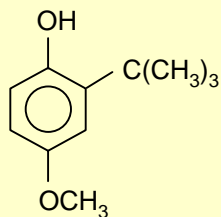

### Chlorpromazine

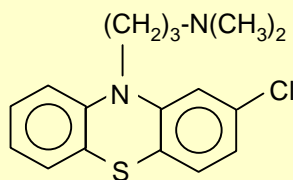

### Butylated hydroxytoluene (BHT)

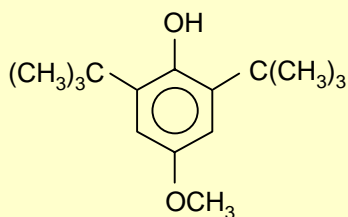

### Curcumin

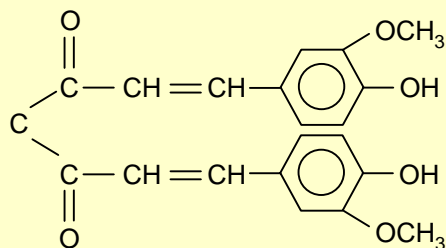

### Trolox

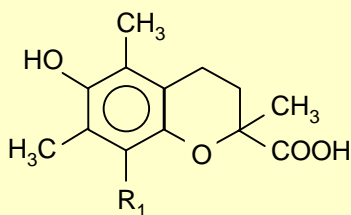

### Catechin

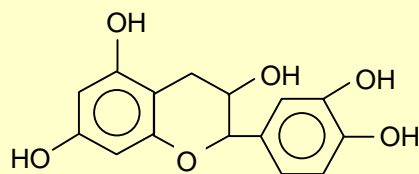

### Propyl gallate

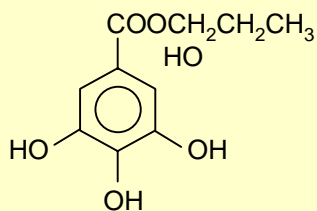

### Quercetin

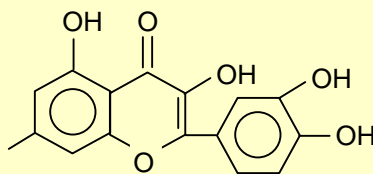

### N,N'-Diphenyl-p-phenylene diamine (DPPD)

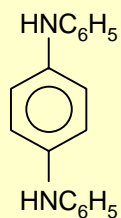

### Sylimarin

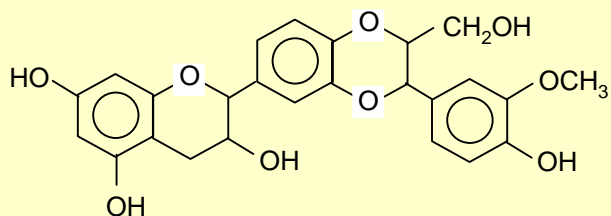

Supplement: MOESM8 [file 9659588]
